# Supplementary material for: MiR-433 and miR-127 Arise from Independent Overlapping Primary Transcripts Encoded by the miR-433-127 Locus
Source: PubMed Central journal article supplement (PMC2570487; doi:10.1371/journal.pone.0003574), 2008-10-30
Supplement: pone.0003574.s001.pdf [file pone.0003574.s001.pdf]

**Genomic location of microRNA-433-127 cluster on mouse chromosome 12**

| <u>miRNA</u> | <u>Chr</u> | <u>miRNA Strand</u> | <u>miRNA Start</u> | <u>miRNA End</u> |
|--------------|------------|---------------------|--------------------|------------------|
| mmu-miR-433  | 12         | NA / +              | 110039521          | 110039645        |
| mmu-miR-127  | 12         | NA / +              | 110040652          | 110040722        |
